# Supplementary material for: Investigating the cultural and contextual determinants of antimicrobial stewardship programmes across low-, middle- and high-income countries—A qualitative study
Source: PubMed Central journal article supplement (PMC6335060; doi:10.1371/journal.pone.0209847), 2019-01-16
Supplement: pone.0209847.s001.pdf [file pone.0209847.s001.pdf]

Study II: **Shared healthcare professional engagement in antimicrobial stewardship programmes – what we can learn from other healthcare systems**

**APPENDIX C:** Assessment toolkit for antimicrobial stewardship programmes in hospitals  
**Study Title:** How is antimicrobial stewardship (AMS) defined and implemented across a multisite healthcare setting?

Semi-structured interview guide

**Organisational level:**

**Roles and responsibilities**

1. Who is **responsible** for antibiotic prescribing in your organisation?
  - a. How is it delegated?
  - b. Does it work in practice?
2. Do you think you have a role or responsibility in antibiotic prescribing in your organisation?
3. What are the **external (if any) influences such as policy, governance, inspections** for an antibiotic prescribing programme at the hospital?
4. **What or who influences** how you rank your priorities?
  - a. **What influences how you allocate the available resources both human and economic?**
5. Are there any **policies or guidelines** in your organisation for antibiotic prescribing?
6. What groups of healthcare professionals are identified as having a **role in antibiotic prescribing/infection control** activities at organisational level?

**Reporting structures and data**

Organisational:

7. Is there a **reporting structure** for antibiotic use and prescribing in your organisation?
  - a. What about national level?
8. What are the **quality indicators**, if any, for antibiotic prescribing at board level?
9. **Who** measures these?
10. How are indicators **reported**? How often?
11. How much of what is presented at the board is shared with the **average employee** in the organisation?
  - a. If it is shared, how is it shared?
  - b. Via what mechanism? Mass email? Newsletter?
  - c. How often is it shared? Weekly, monthly, etc
  - d. Is there any **demand for employees** for information/data on antibiotic prescribing?
12. Are there specific antibiotic prescribing or infection control related **committees/meetings/units**?
  - a. Who is represented here?
  - b. How often do they meet?
  - c. Is there cross-representation at other units/teams? i.e. how is information shared across teams/committees?

Local:

13. Is there regular **local (meaning, department/unit) measuring of antibiotic prescribing**?
  - a. If yes, what is measured?
  - b. Who measures the data?
  - c. Who is the data feedback to?
  - d. How often?
14. Is any **public/patient engagement** in antimicrobial prescribing undertaken?
15. In relation to antibiotics **what kind of data** would you like to have available at organisational or local level?
  - a. Why this particular data?

**Study II: Shared healthcare professional engagement in antimicrobial stewardship programmes – what we can learn from other healthcare systems**

**Individual interventions:**

Participants will be asked to think of a recent intervention they implemented as part of an antibiotic prescribing programme and asked the following:

Intervention aims and measures

1. Are you aware of any recent interventions targeting antibiotic use in your hospital?
  - a. What about other hospitals?
2. In YES, ask questions below, if **NO: are there any antibiotic related interventions, which you think should be implemented in your organisation? IF YES ADAPT BELOW TO FUTURE TENSE**
3. What was the trigger for the intervention? Outbreak? Cost-saving? AMR?
4. Why would this intervention be an improvement?
5. What were the intervention aims?
  - a. Who was involved in setting the aims?
  - b. Were potential unintended outcomes addressed?
6. How and what did you measure?
  - a. Who collected these measures?
  - b. Could existing data from the hospital pharmacy?

Feedback loop

7. Was there a feedback plan?
  - a. Who received feedback,
  - b. How often?
  - c. In what format?
  - d. Was there a structured dialogue? For example discussion or explanation around the findings?
8. Was there follow up on the feedback?
  - a. If yes, please describe it

At the end:

**How do you think UK is doing compared to other similar healthcare systems in relation to AMR/HCAI?**

**In an ideal world what would you like to see implemented on antibiotic prescribing?**

**What are the barriers to implement this?**
